# Supplementary material for: Effects of AAV-mediated knockdown of nNOS and GPx-1 gene expression in rat hippocampus after traumatic brain injury
Source: PLOS journal article supplement (doi:10.1371/journal.pone.0185943), 2017-10-10
Supplement: S2 (10.1371/journal.pone.0185943.s002) [file journal.pone.0185943.s002]

## S2 Figure.

### CD 68 and TCR immunos

#### CD68

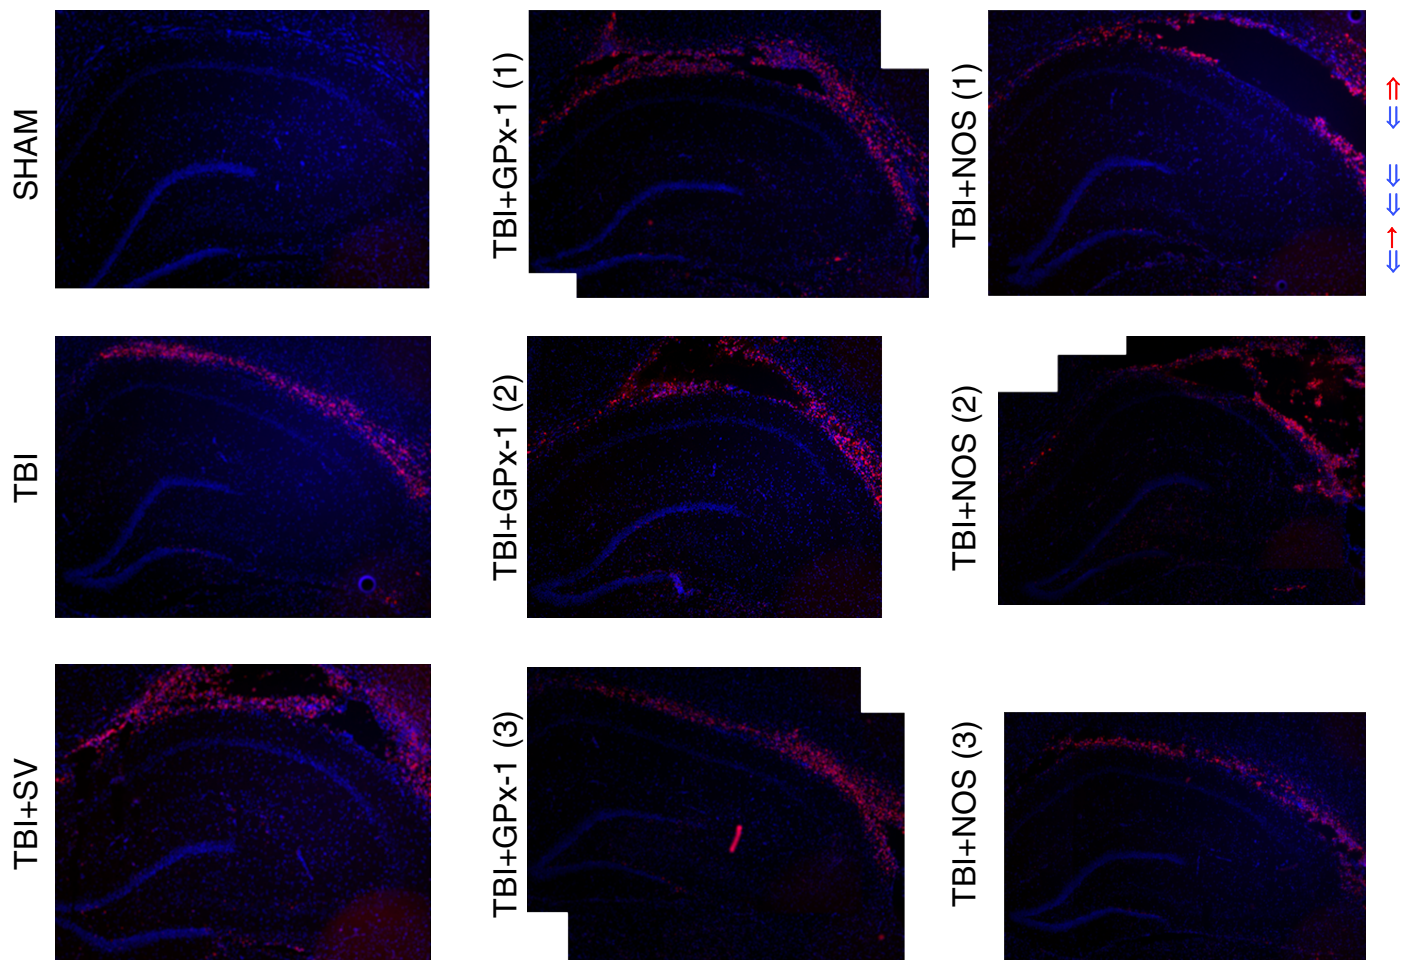

**S2 Figure.** Immunohistochemical analysis of CD68 immunoreactivity in brain sections from rats treated with SHAM, TBI, TBI+ SV, and all three TBI+ nNOS or TBI+ Gpx-1AAV vectors. No discernable increase in CD68 immunostaining, beyond that induced by TBI, was detectable in any AAV treated brains, suggesting that virus-induced inflammation would not confound the effects of siRNA vectors.
